# Supplementary material for: Structural signatures in EPR3 define a unique class of plant carbohydrate receptors
Source: PubMed Central journal article supplement (PMC7392887; doi:10.1038/s41467-020-17568-9), 2020-07-30
Supplement: 41467_2020_17568_MOESM1_ESM.pdf [file 41467_2020_17568_MOESM1_ESM.pdf]

## **SUPPLEMENTARY INFORMATION**

### **Structural signatures in EPR3 define a unique class of plant carbohydrate receptors**

Wong et al.

## Supplementary Table 1 Data collection and refinement statistics

| EPR3                                                    |                        |
|---------------------------------------------------------|------------------------|
| <b>Data collection</b>                                  |                        |
| Space group                                             | P 1 21 1               |
| Cell dimensions                                         |                        |
| <i>a</i> , <i>b</i> , <i>c</i> (Å)                      | 59.82, 36.08, 72.66    |
| $\alpha$ , $\beta$ , $\gamma$ (°)                       | 90.00, 93.92, 90.00    |
| Resolution range (Å)                                    | 47.7-1.87 (1.94-1.87)* |
| <i>R</i> <sub>meas</sub> (%)                            | 9.8 (94.6)             |
| CC1/2                                                   | 0.99 (0.82)            |
| <i>I</i> / $\sigma I$                                   | 15.72 (1.82)           |
| Completeness (%)                                        | 96.9 (84.2)            |
| Redundancy                                              | 6.3 (4.7)              |
| <b>Refinement</b>                                       |                        |
| No. unique reflections                                  | 25173 (2151)           |
| Reflections in <i>R</i> <sub>free</sub> set             | 2000                   |
| <i>R</i> <sub>work</sub> / <i>R</i> <sub>free</sub> (%) | 16.3 / 21.0            |
| No. residues                                            | 302                    |
| No. atoms                                               |                        |
| Protein                                                 | 2362                   |
| Glycosylation +<br>small solutes                        | 42                     |
| Water                                                   | 170                    |
| <i>B</i> -factors (Å <sup>2</sup> )                     |                        |
| Protein                                                 | 39.8                   |
| Glycosylation +<br>small solutes                        | 83.9                   |
| Water                                                   | 44.4                   |
| R.m.s. deviations                                       |                        |
| Bond lengths (Å)                                        | 0.015                  |
| Bond angles (°)                                         | 1.17                   |

Data was collected from one crystal.

\*Values in parentheses are for highest-resolution shell.

## Supplementary Table 2 SAXS data collection and scattering-derived parameters

| Protein                                                     | EPR3          | EPR3 + R7A EPS |
|-------------------------------------------------------------|---------------|----------------|
| <b>Data collection</b>                                      |               |                |
| Beamline                                                    | PETRA III P12 | PETRA III P12  |
| Wavelength (nm)                                             | 1.24          | 1.24           |
| s range (nm <sup>-1</sup> )                                 | 0.120 - 3.340 | 0.106 - 3.063  |
| Exposure time (s)                                           | 0.045         | 0.045          |
| Concentration range (mg/ml)                                 | 0.6 - 22      | 0.6 - 22       |
| (data shown for 6.8)                                        |               |                |
| Ligand concentration (M)                                    | N/A           | 0.001          |
| Temperature (°C)                                            | 20            | 20             |
| <b>Structural parameters</b>                                |               |                |
| R <sub>g</sub> (nm) from Guinier                            | 2.29 ± 0.2    | 2.22 ± 0.1     |
| R <sub>g</sub> (nm) from P(r) plot                          | 2.28 ± 0.07   | 2.02 ± 0.04    |
| D <sub>max</sub> (nm)                                       | 7.5           | 7.1            |
| Porod volume estimate (Å <sup>3</sup> )                     | 56.7          | 52.5           |
| Estimated molecular mass from Porod volume (kDa)            | 29.0          | 26.5           |
| Estimated molecular mass from forward scattering I(0) (kDa) | 24.7          | 24.7           |
| Calculated molecular mass from amino acid sequence (kDa)*   | 23.6          | 23.6           |
| Estimated mass of glycosylated EPR3 from SDS-PAGE (kDa)     | 25-35         | 25-35          |
| <b>Software employed</b>                                    |               |                |
| Primary data reduction                                      | Primus        |                |
| <i>Ab initio</i> analysis                                   | BioXtas RAW   |                |
| Rigid body modeling                                         | DAMMIN/DAMMIF |                |
| Visualization                                               | colores/PyMOL |                |

\* The molecular mass was calculated without considering the contributions from glycosylation.

**a**

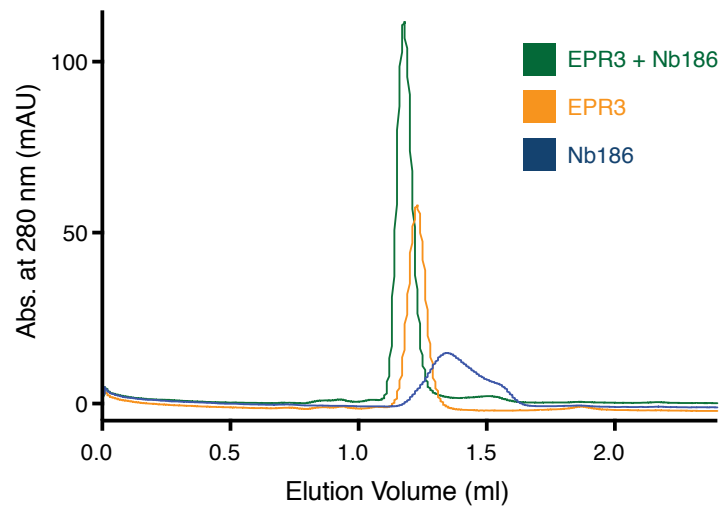

**b**

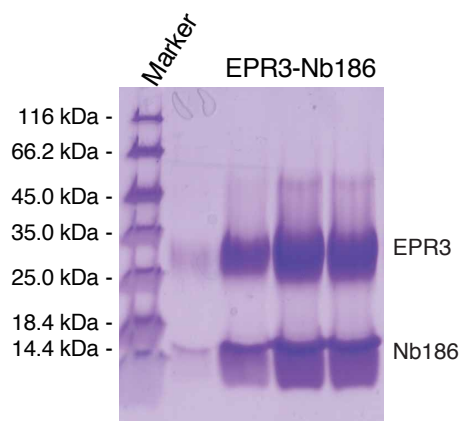

**c**

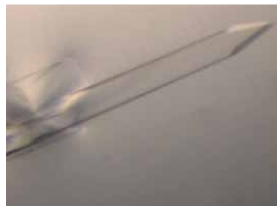

**Supplementary Fig. 1 | Purification of the EPR3-Nb186 complex.** **a**, Overlay of chromatograms from SEC experiments with EPR3, Nb186 and the EPR3-Nb186 complex. **b**, SDS-PAGE of the EPR3-Nb186 complex used for crystallization and **c**, a representative image of a single EPR3-Nb186 crystal.



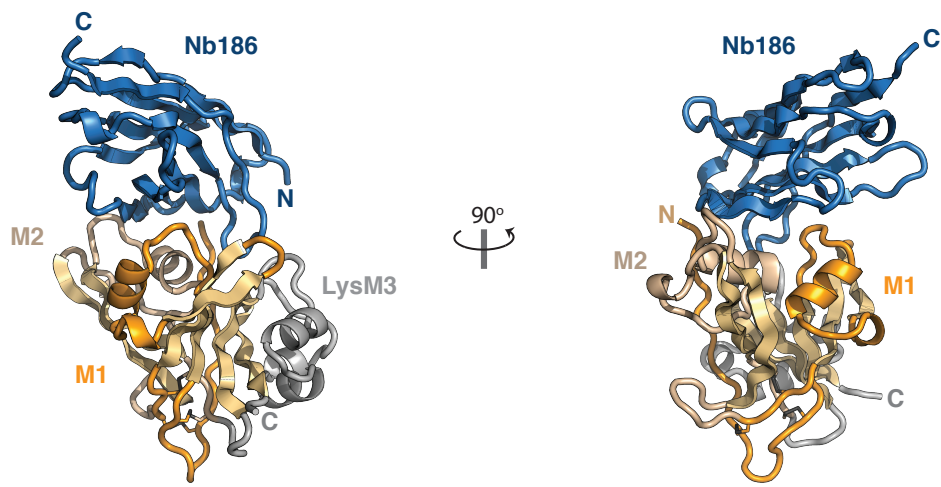

**Supplementary Fig. 2 | The EPR3-Nb186 structure.** Cartoon representation of the EPR3-Nb186 complex crystal structure with Nb186 coloured in blue and EPR3 coloured as in Fig. 1.

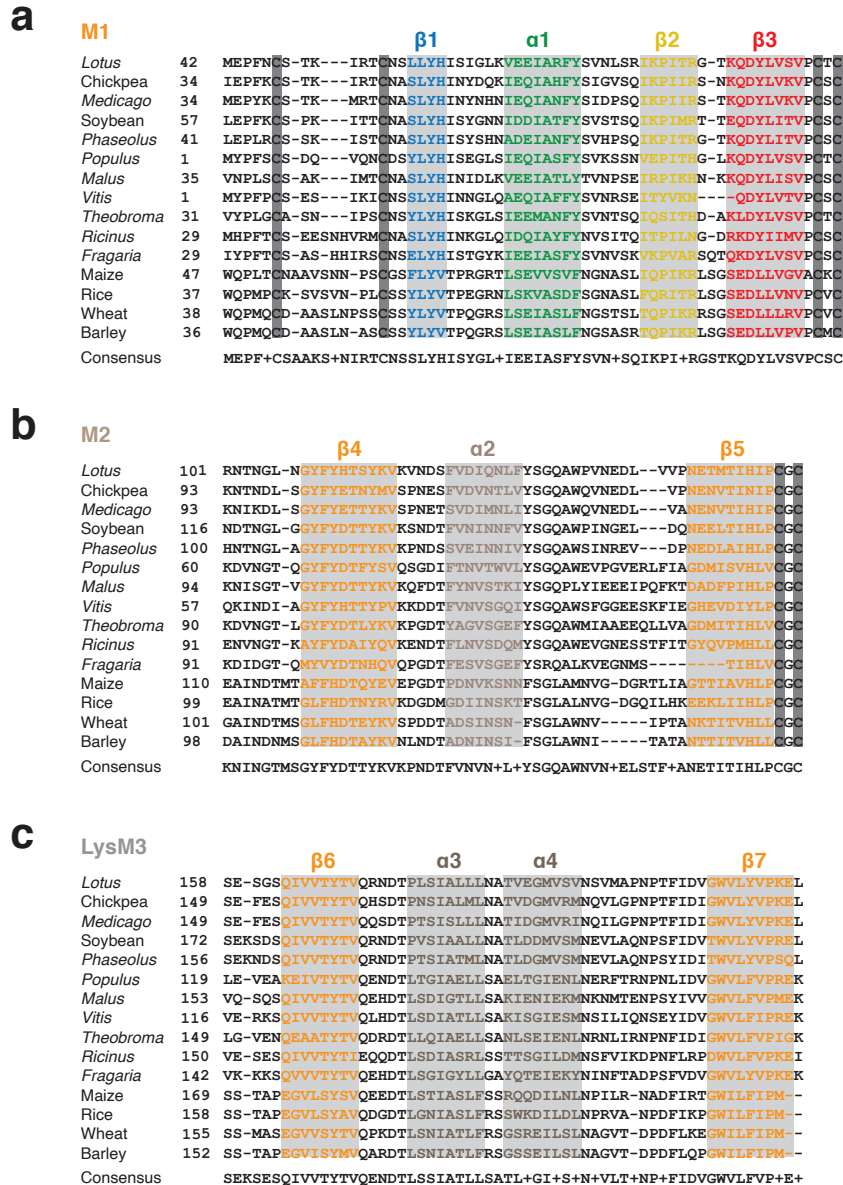

**Supplementary Fig. 3 | Sequence alignment of EPR3 homologues.** Sequence alignment of the extracellular domain of EPR3 homologues from dicots (legumes and non-legumes) and monocots showing the conserved secondary structure arrangement of **a**, M1 ( $\beta\alpha\beta$  fold) **b**, M2 ( $\beta\alpha\beta$  fold) and **c**, LysM3 ( $\beta\alpha\alpha\beta$  fold). *Lotus* (BAI79269.1), *Chickpea* (XP\_004489790.1), *Medicago* (XP\_003613165.1), *Soybean* (XP\_003517716.1), *Phaseolus* (XP\_007157313.1), *Populus* (XP\_002322185.1), *Malus* (XP\_008340354.1), *Vitis* (XP\_002272814.2), *Theobroma* (XP\_007036352.1), *Ricinus* (XP\_002527912.1), *Fragaria* (XP\_004300916.1), *Maize* (XP\_008657477.1), *Rice* (XP\_015628733.1), *Wheat* (CDM80098.1) and *Barley* (MLOC\_5489.2).

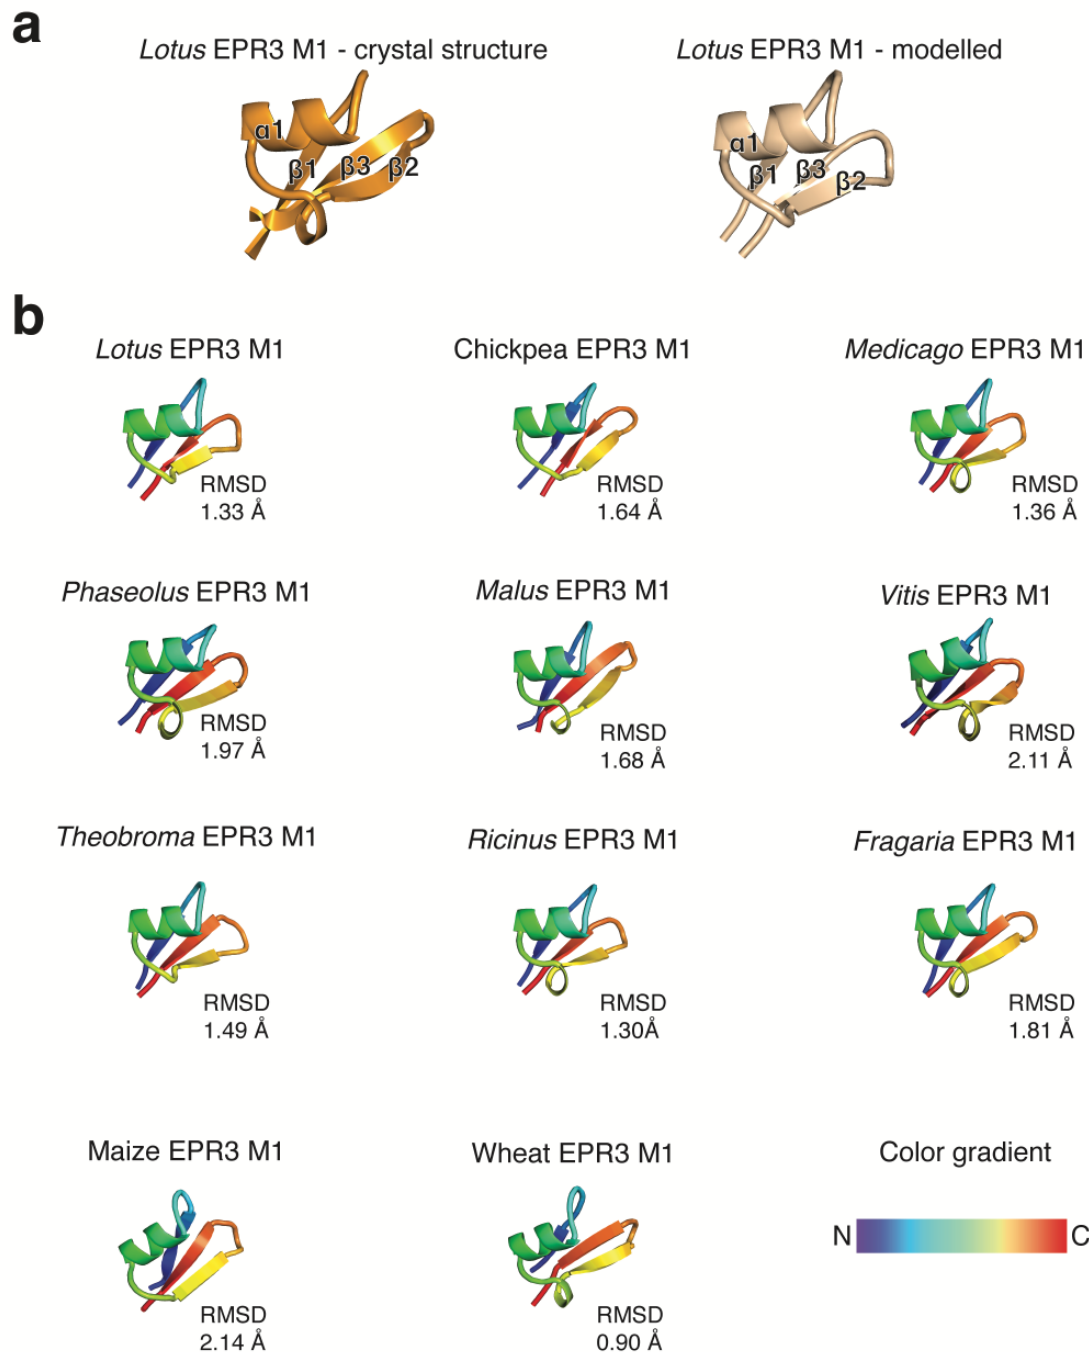

**Supplementary Fig. 4 | Structural modelling of M1 from EPR3 homologues.** **a**, Side-by-side comparison of the EPR3 crystal structure of M1 and an *ab-initio* atomic-level force field model of EPR3 M1. **b**, Modelling of M1 from EPR3 homologues reveals the same overall  $\beta\alpha\beta\beta$  arrangement. The molecular fit (RMSD) in Å to the crystal structure of EPR3-M1 is denoted.

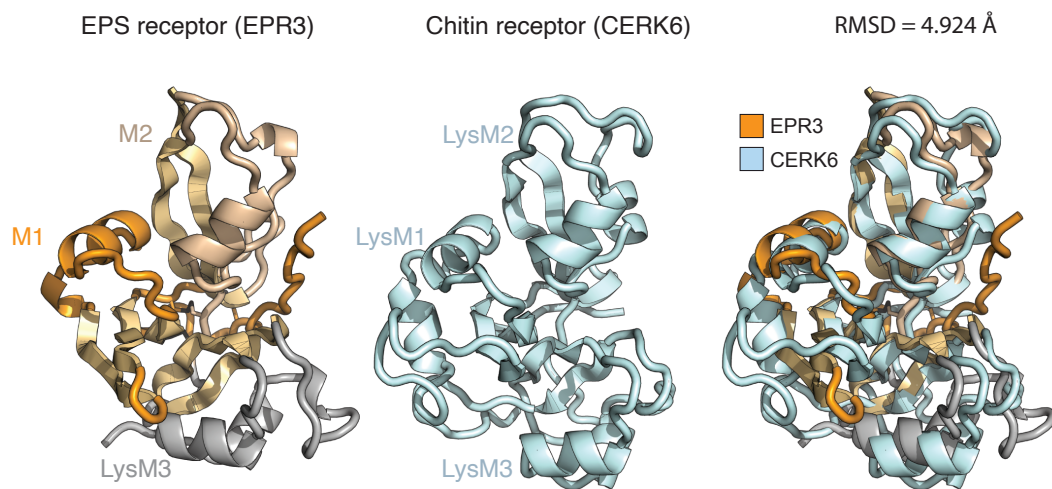

**Supplementary Fig. 5 | Structural comparison of plant receptors.** Cartoon representations of EPS (*Lotus* EPR3) and chitin (*Lotus* CERK6) receptors coloured as indicated. The root mean square deviation (RMSD) of the structural superposition is given in Å (Rigid-body superimposition of 112 equivalent C $\alpha$  atoms).





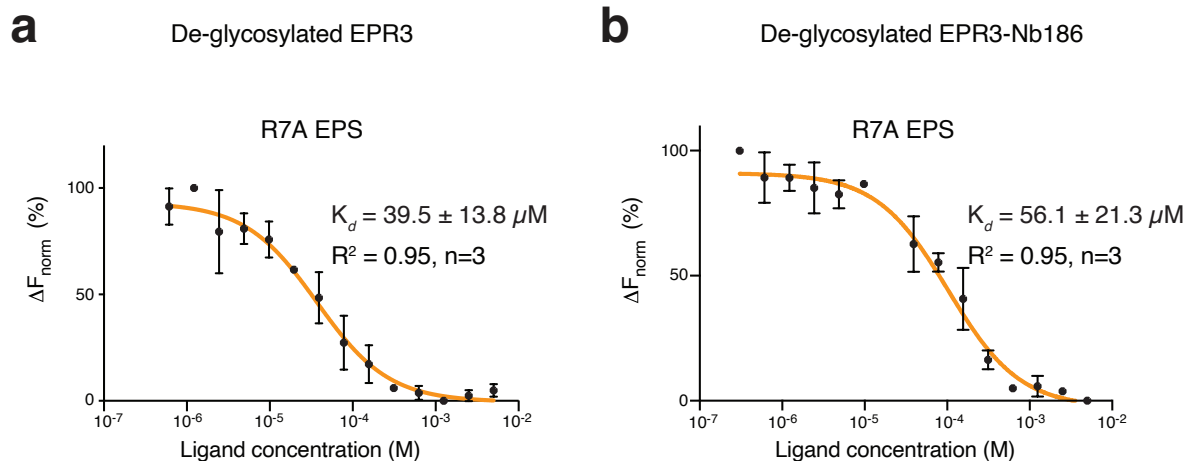

**Supplementary Fig. 7 | Binding experiments with de-glycosylated EPR3 and de-glycosylated EPR3-Nb186 complex. a,** MST binding experiment of de-glycosylated EPR3 to R7A EPS. **b** MST binding experiment of de-glycosylated EPR3-Nb186 complex to R7A EPS. The equilibrium dissociation constants ( $K_d$ ) in the 95% confidence interval, goodness of fit ( $R^2$ ), and number of independent protein preparations used for the measurements ( $n$ ) are reported.

**a**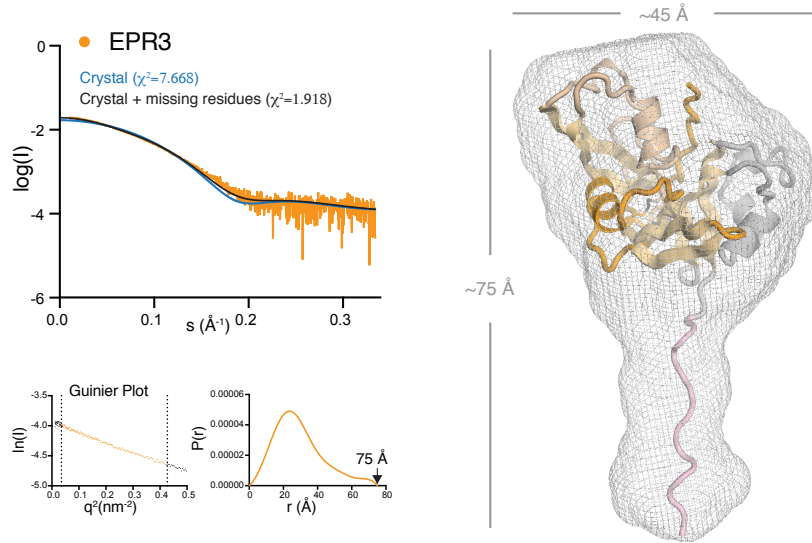**b**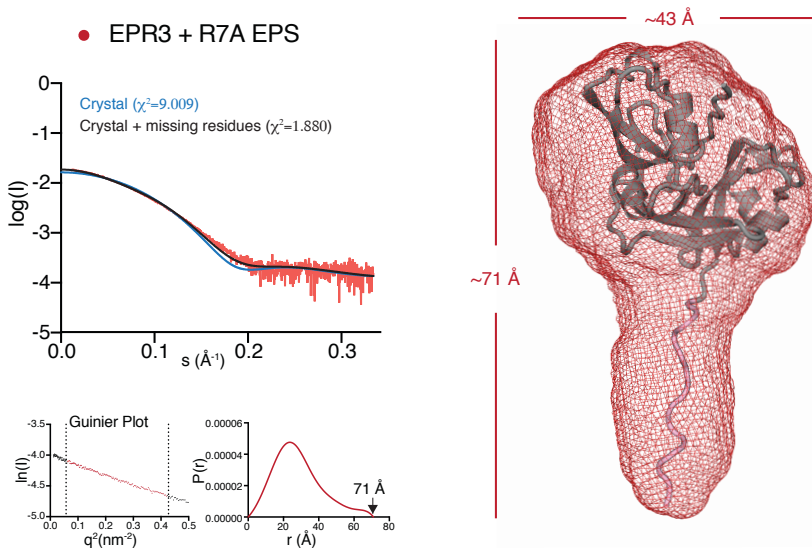**c**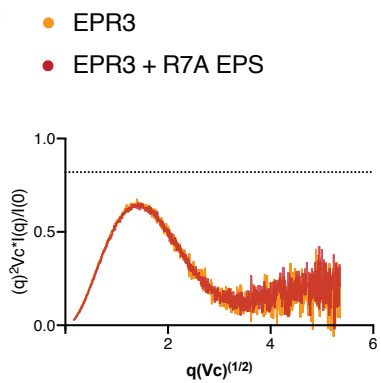**d**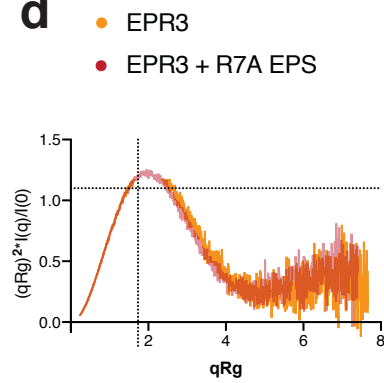



**Supplementary Fig. 8 | SAXS data, fits and models.** SAXS analysis of EPR3 showing scattering curve with model fit for EPR3 in the **a**, absence of ligand and **b**, in the presence of R7A EPS ligand. Guinier plots and  $P(r)$  distance distribution plot with  $D_{max}$  are shown together with docking of EPR3 into the SAXS envelope. EPR3 has an extended stem-like structure in both the absence and presence of ligand. The overall dimensions are shown in angstrom ( $\text{\AA}$ ). **c, d** Dimensionless Kratky plots of EPR3 with and without R7A EPS. **c**,  $V_c$ -based with the volume of an ideal sphere (dotted line,  $y = 0.82$ ) and **d**,  $R_g$ -based with indicated Guinier-Kratky point ( $\sqrt{3}/1.1$ , dotted lines). Addition of the ligand does not induce changes in either flexibility or globularity of EPR3.
